# Supplementary material
Source: PubMed Central journal article supplement (PMC7293879)
Supplement: NIHMS1535767-supplement-1.pdf [file NIHMS1535767-supplement-1.pdf]

Appendix 1: Search terms combined with “prostate cancer” on ClinicalTrials.gov

|                 |                |                     |
|-----------------|----------------|---------------------|
| 714-x           | Flax           | Mushrooms           |
| Acupuncture     | Folate         | Nitrates            |
| African cherry  | Fruit          | Nitrites            |
| Alcohol         | Garlic         | Nutrition           |
| Algae           | Gerson         | Obesity             |
| Ambrotose       | Ginger         | Pelvic floor muscle |
| Amino acids     | Ginkgo         | training            |
| Amygdalin       | Ginseng        | Physical activity   |
| Antineoplastons | Glucosamine    | Pilates             |
| Antioxidants    | Golden seal    | Polyphenols         |
| Aromatherapy    | Gonzalez       | Pomegranate         |
| Beer            | Grape seed     | Pomi-t              |
| Beta-sitosterol | Herbs          | Potassium           |
| Bilberry        | High fiber     | Poultry             |
| BMI             | Homeopathic    | Protocel            |
| Boron           | Hydrazine      | Qigong              |
| Broccoli        | Hypnosis       | Reiki               |
| Calcium         | Indole         | Resveratrol         |
| Cannabinoids    | Iron           | Rye                 |
| Cannabis        | Isoflavins     | Saw palmetto        |
| Carbohydrate    | Isoflavones    | Selenium            |
| Carotene        | Isothiocyanate | Shark               |
| Cartilage       | Laetrile       | Smoking             |
| Chelation       | Lifestyle      | Soy                 |
| Cholesterol     | Lignans        | St. john's wort     |
| Chondroitin     | Linolenic acid | Sugar sweetened     |
| Chromium        | Liquor         | beverages           |
| Citrus          | Low calorie    | Sulforaphane        |
| Coenzyme q      | Low fat        | Tea                 |
| Coffee          | Low salt       | Tobacco             |
| Cruciferous     | Lycopene       | Tomatoes            |
| Curcumin        | Magnesium      | Turmeric            |
| Dairy           | Magnets        | Una de gato         |
| Dandelion       | Marijuana      | Valerian root       |
| Diet            | Massage        | Vegetables          |
| Echinacea       | MBSR           | Vitamin             |
| Eggs            | Meat           | Weight loss         |
| Essiac          | Meditation     | Wine                |
| Exercise        | Milk thistle   | Zinc                |
| Eucalyptus      | Mindfulness    | Zyflamend           |
| Fish            | Mineral        |                     |
| Fish oil        | Mistletoe      |                     |
| Flavonoids      | Multivitamins  |                     |
